# Supplementary figures and images for: Enzyme-modified Panax ginseng inhibits UVB-induced skin aging through the regulation of procollagen type I and MMP-1 expression
Source: Royal Society of Chemistry journal article supplement (doi:10.1039/c3fo60418g), 2013-10-31

# Representative picture

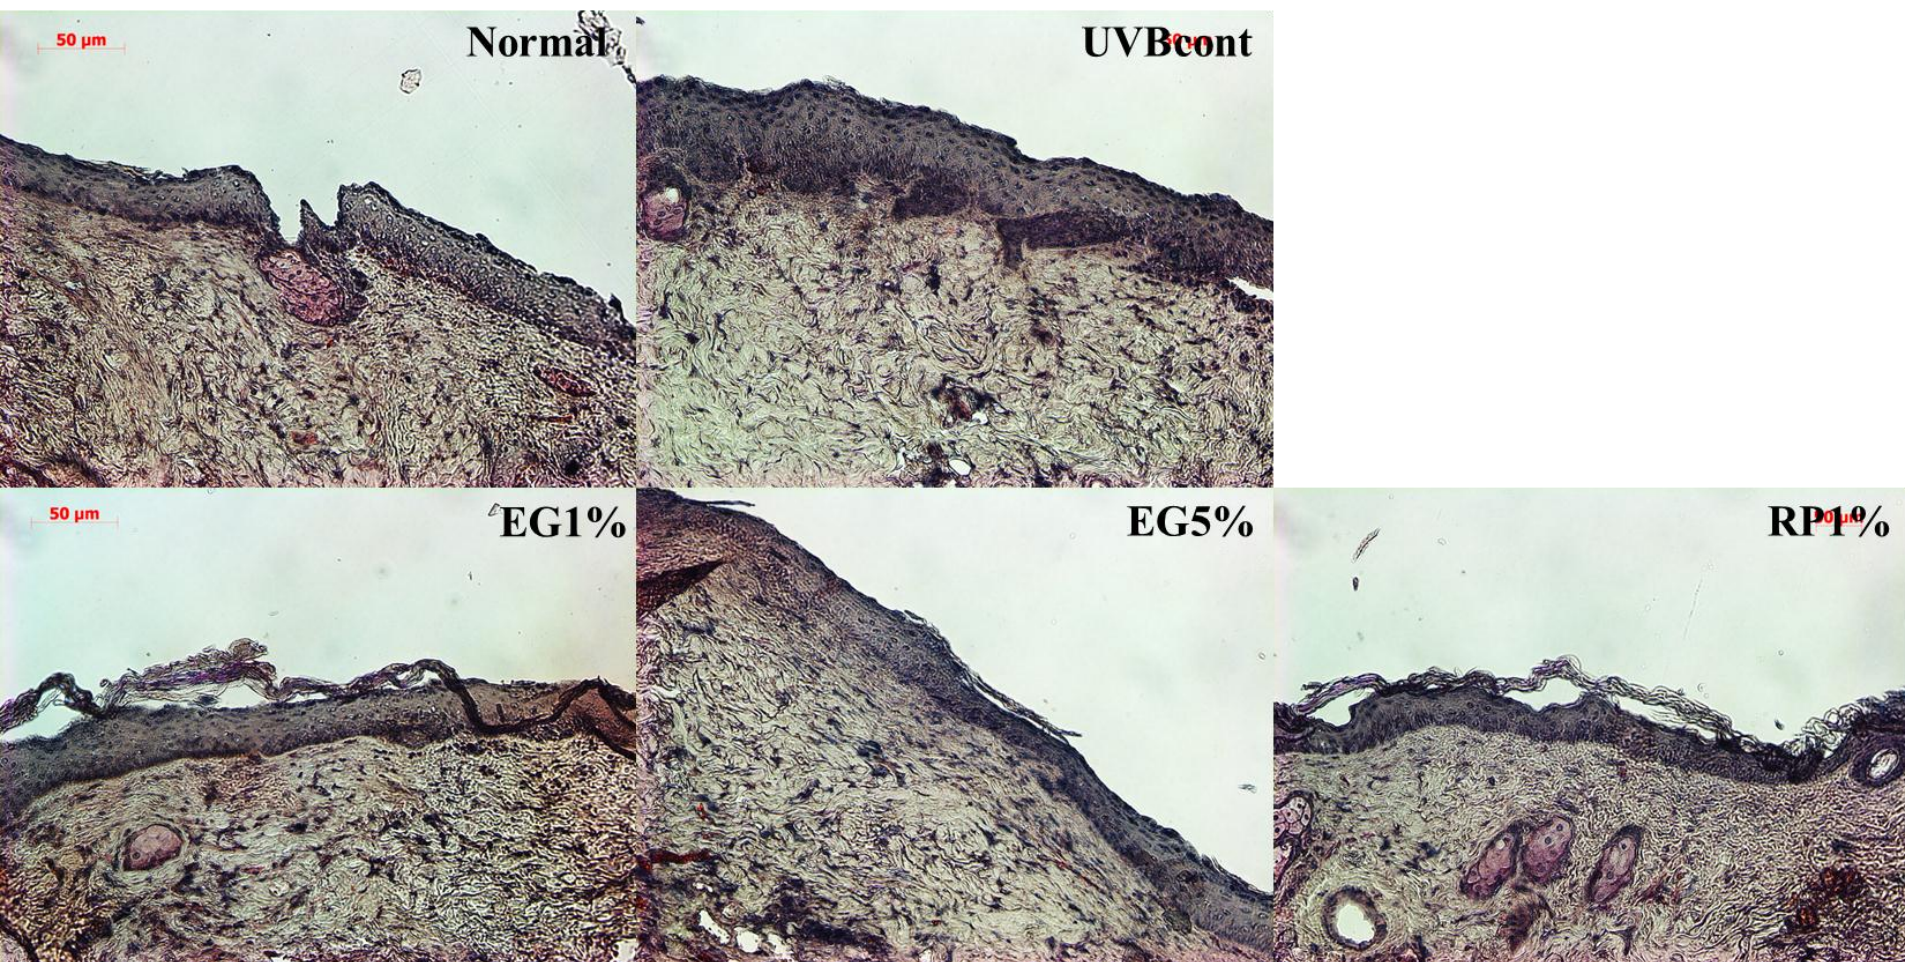



# Normal

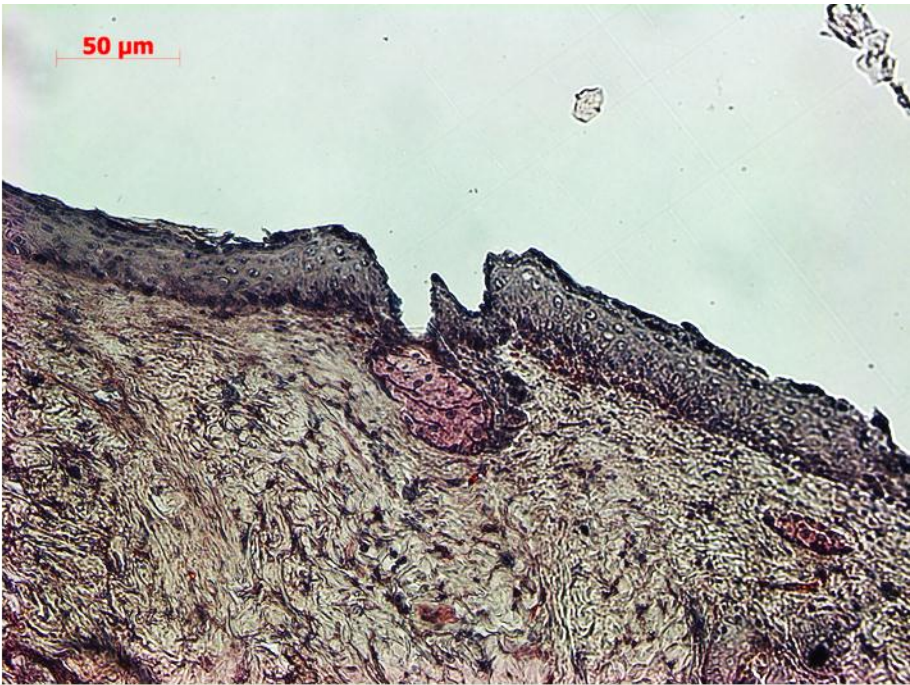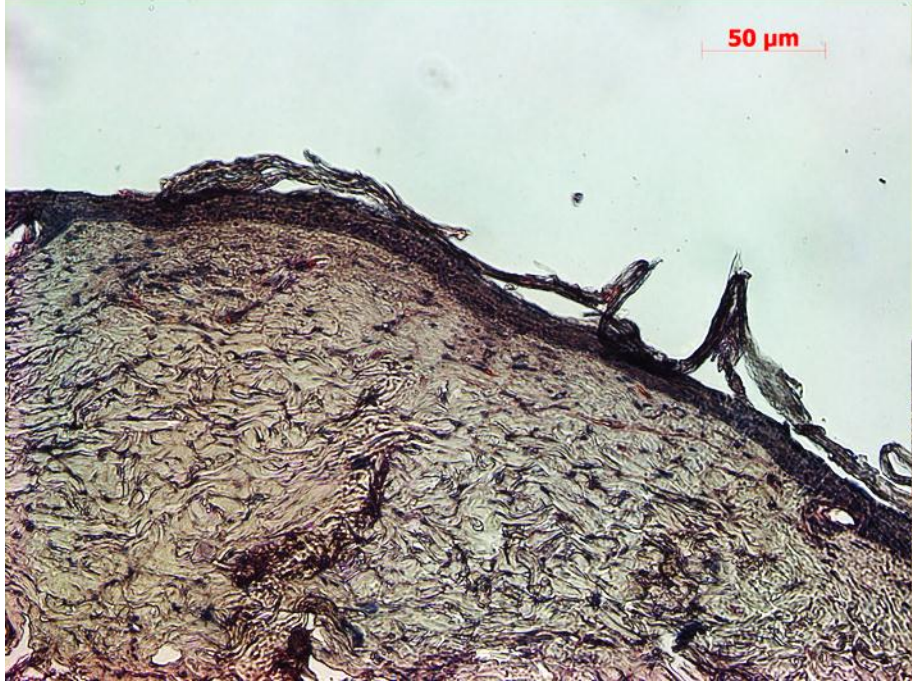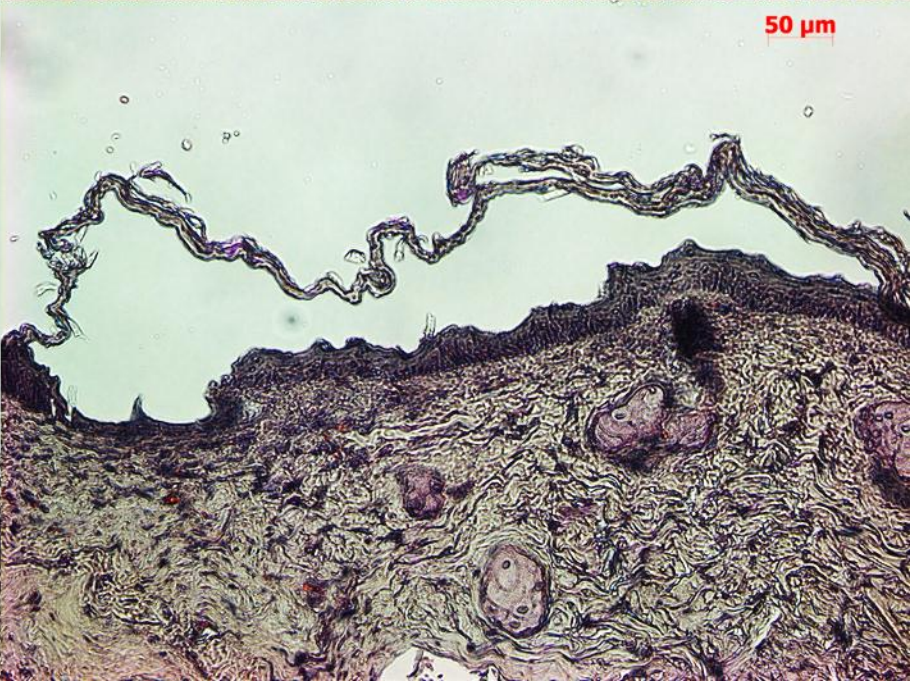



## UVBcont

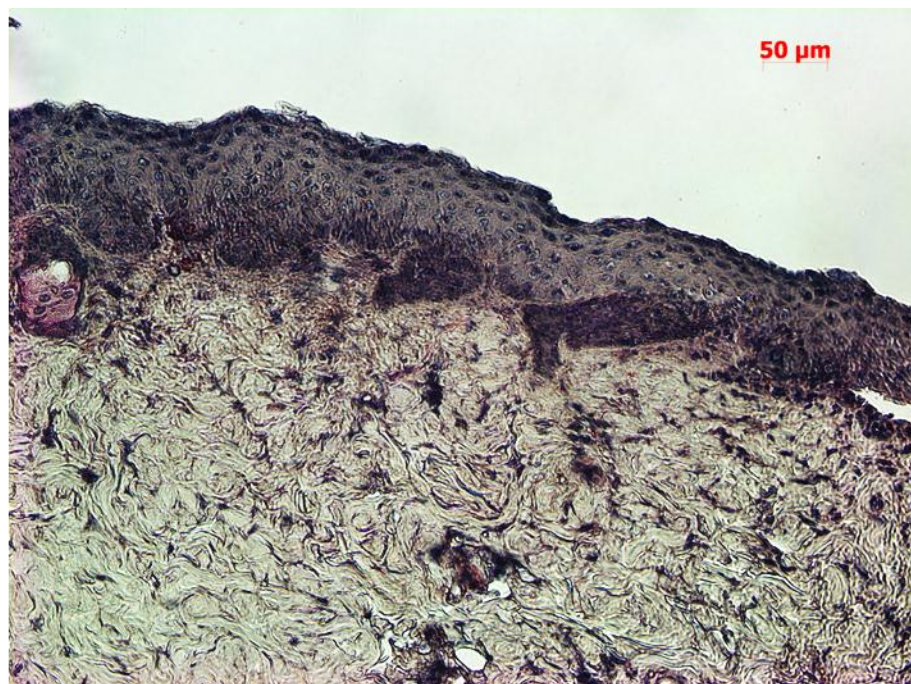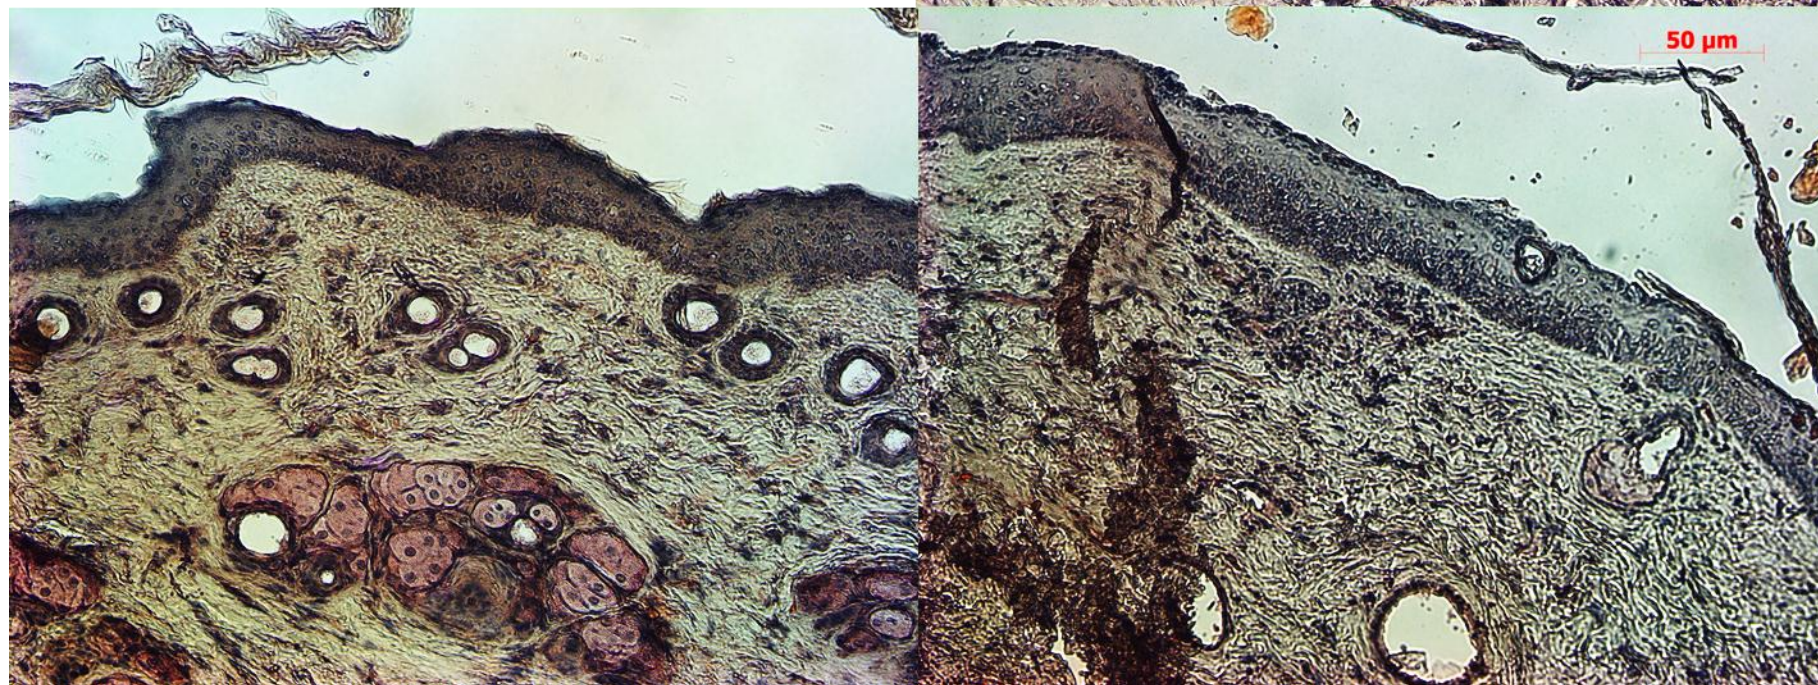



## EG 1%

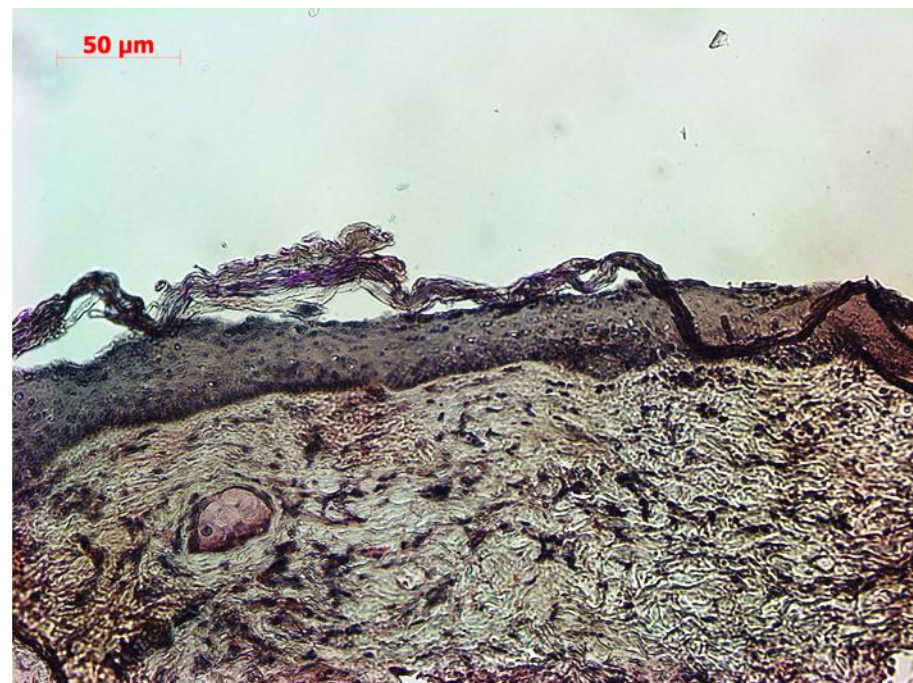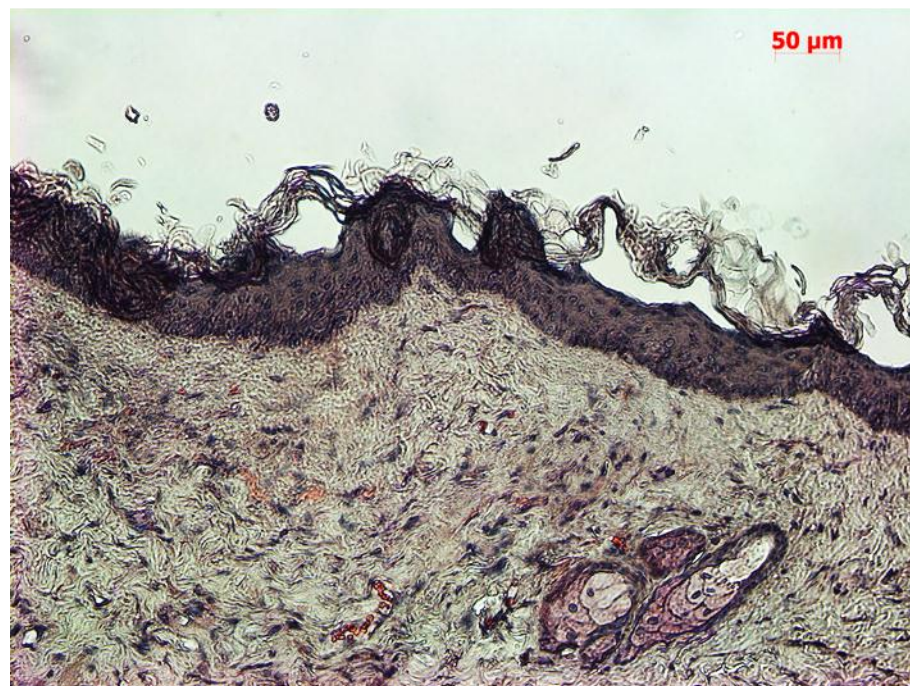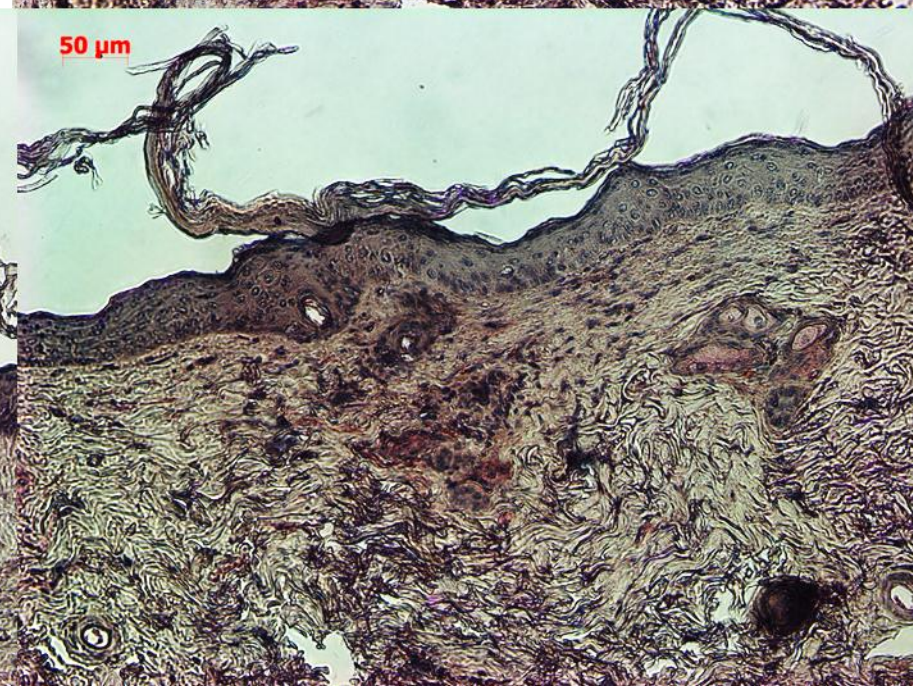



## EG 5%

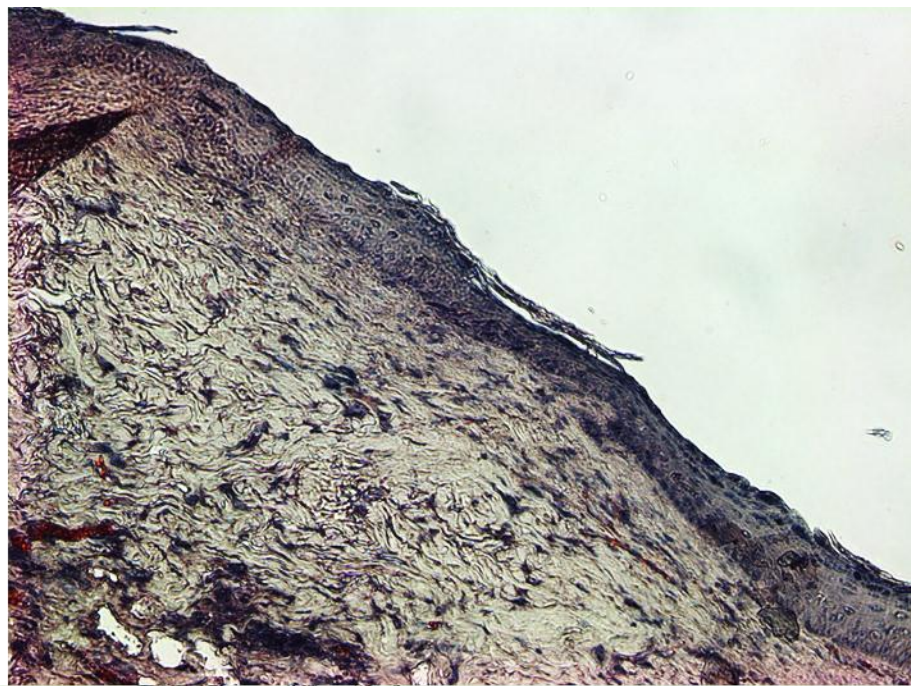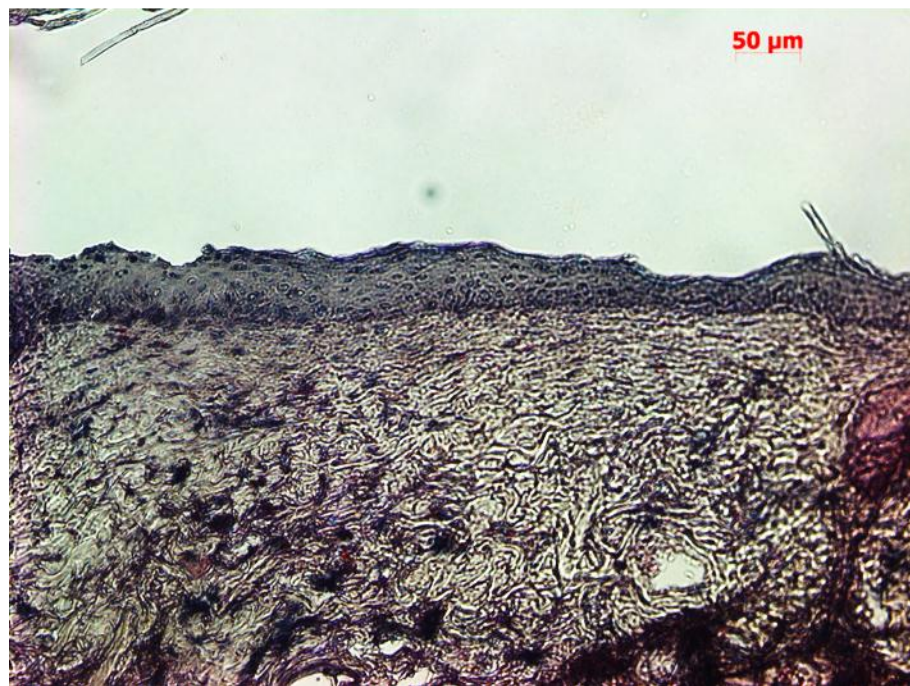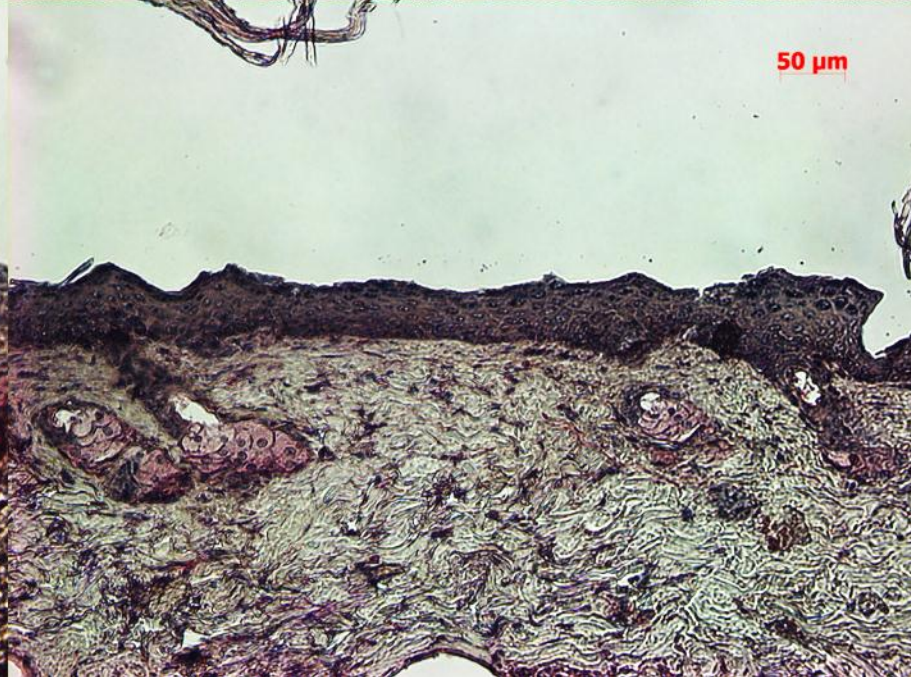



## RP 1%

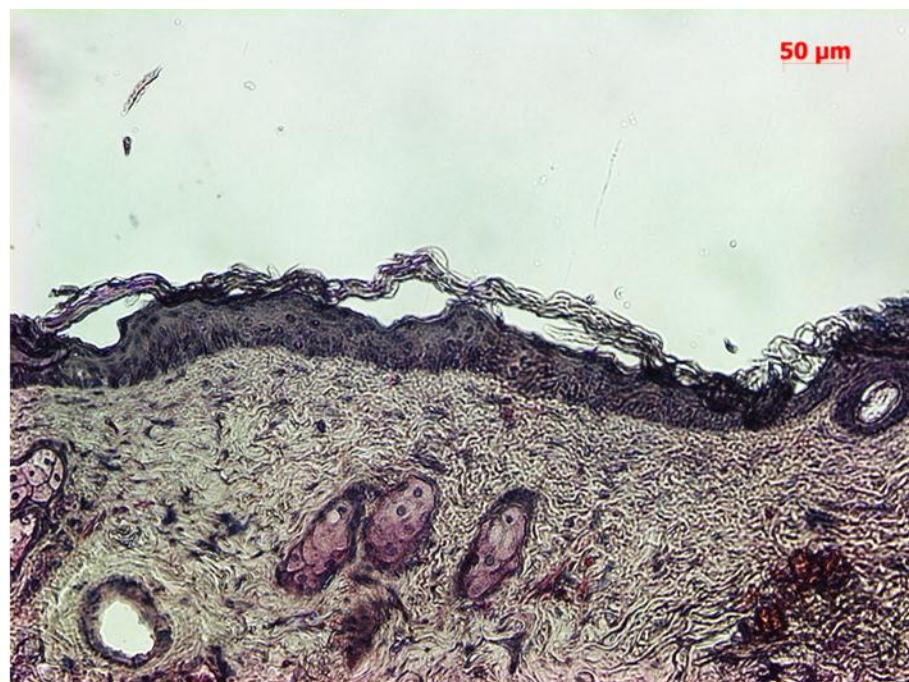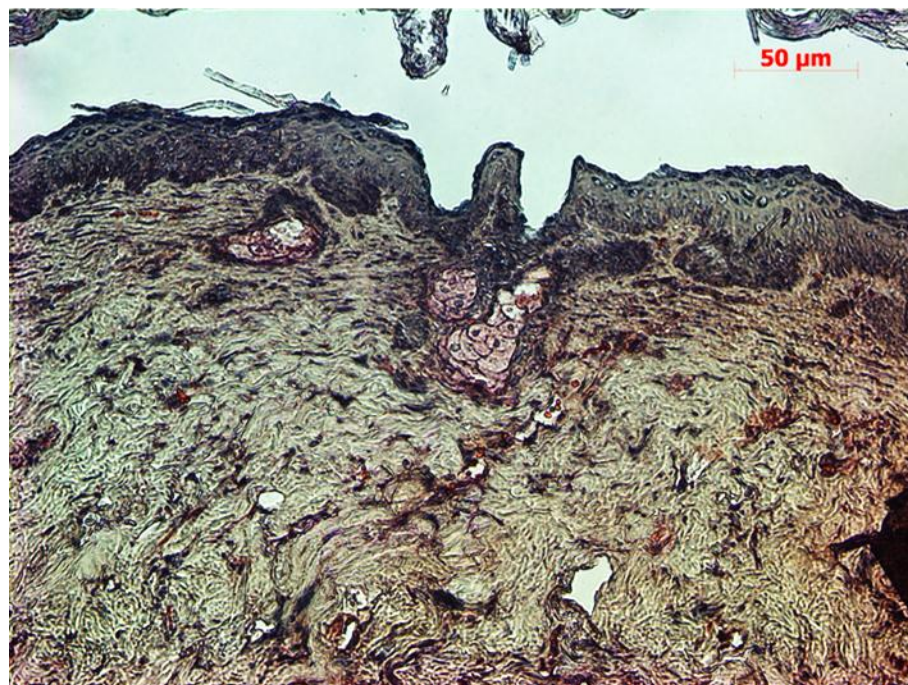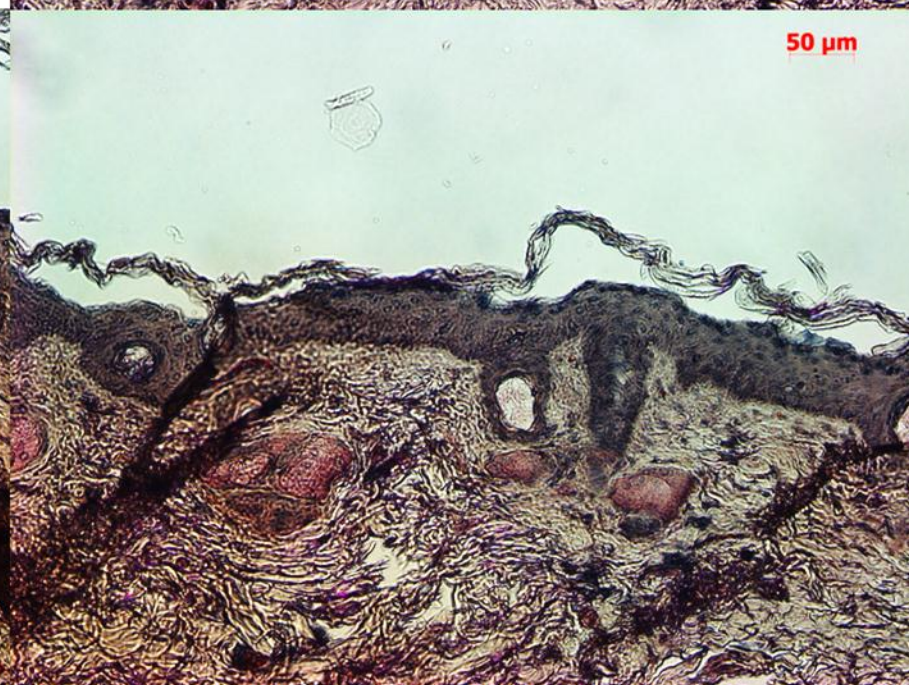



# Representative picture

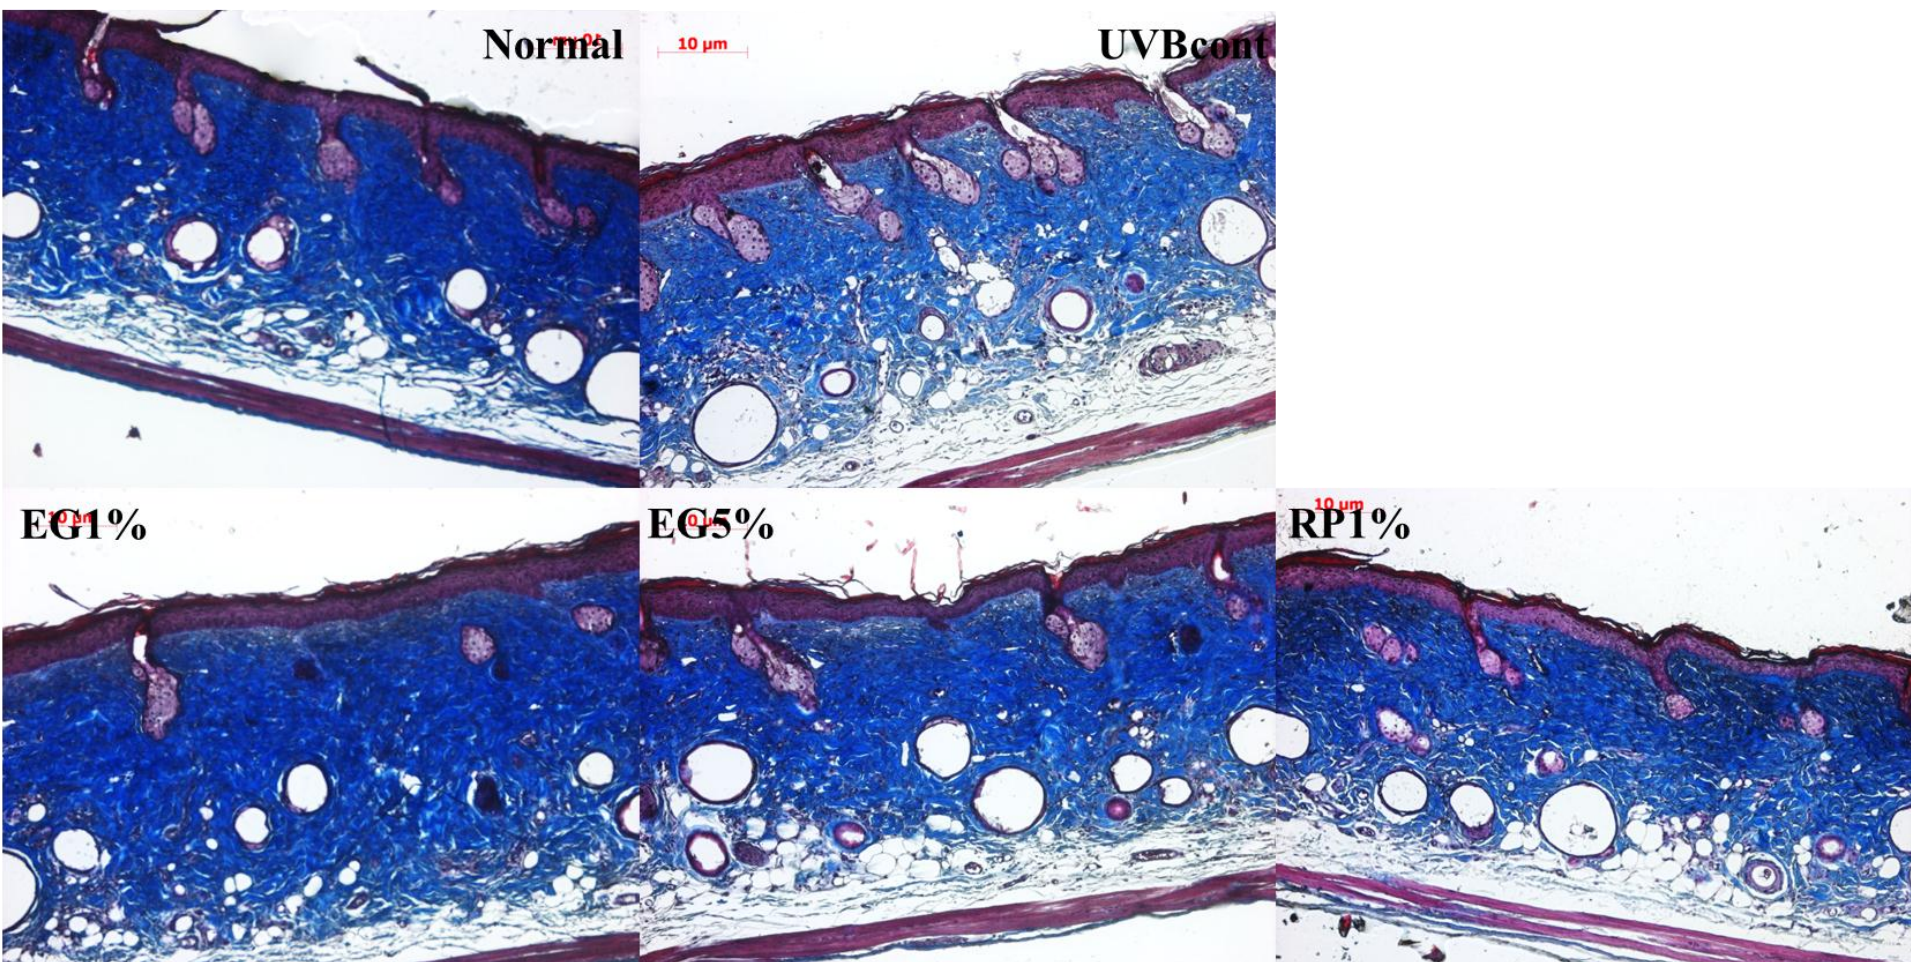



# Normal

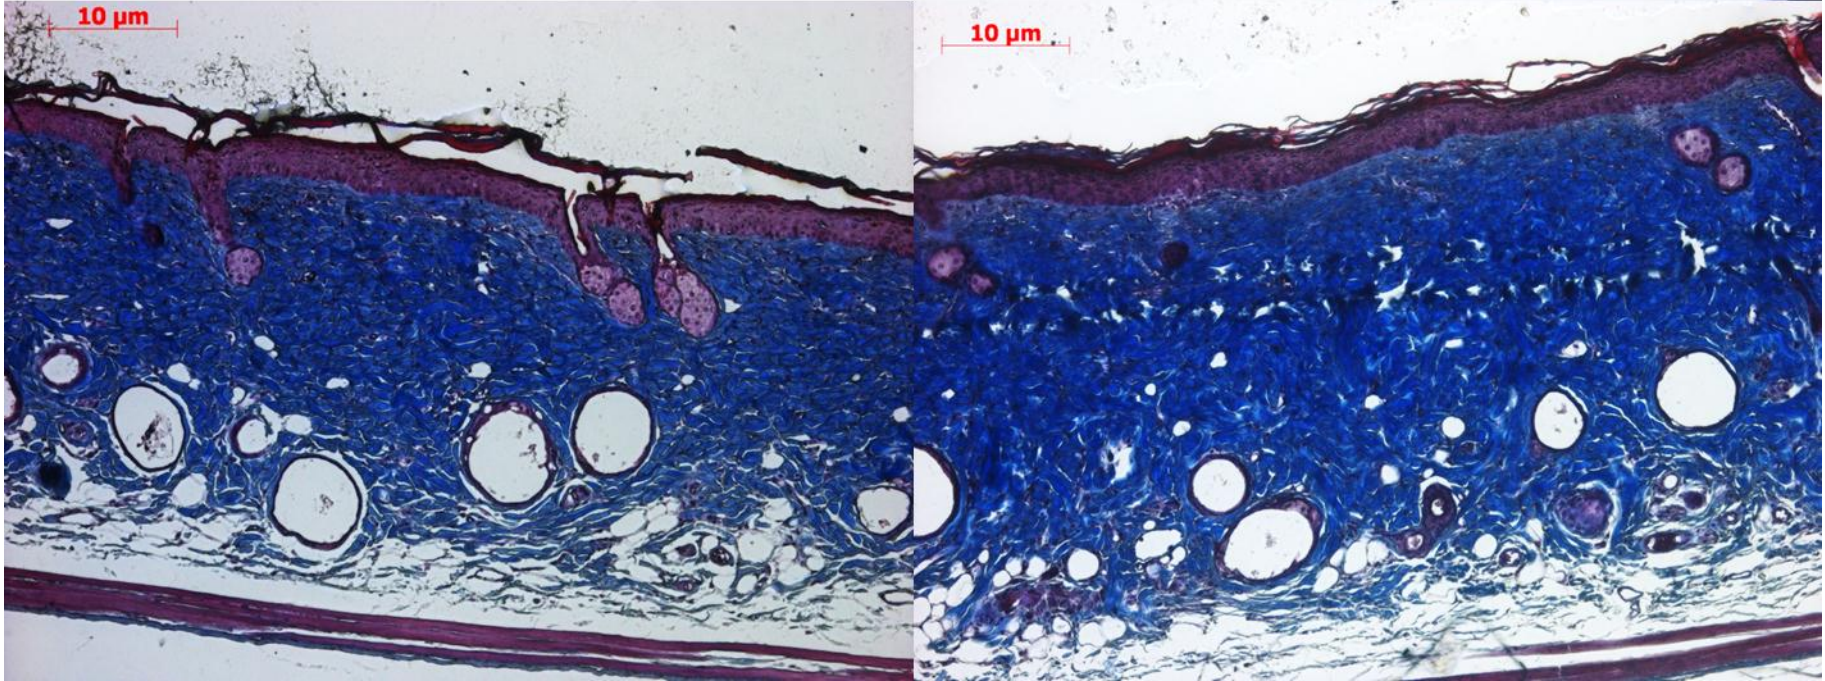



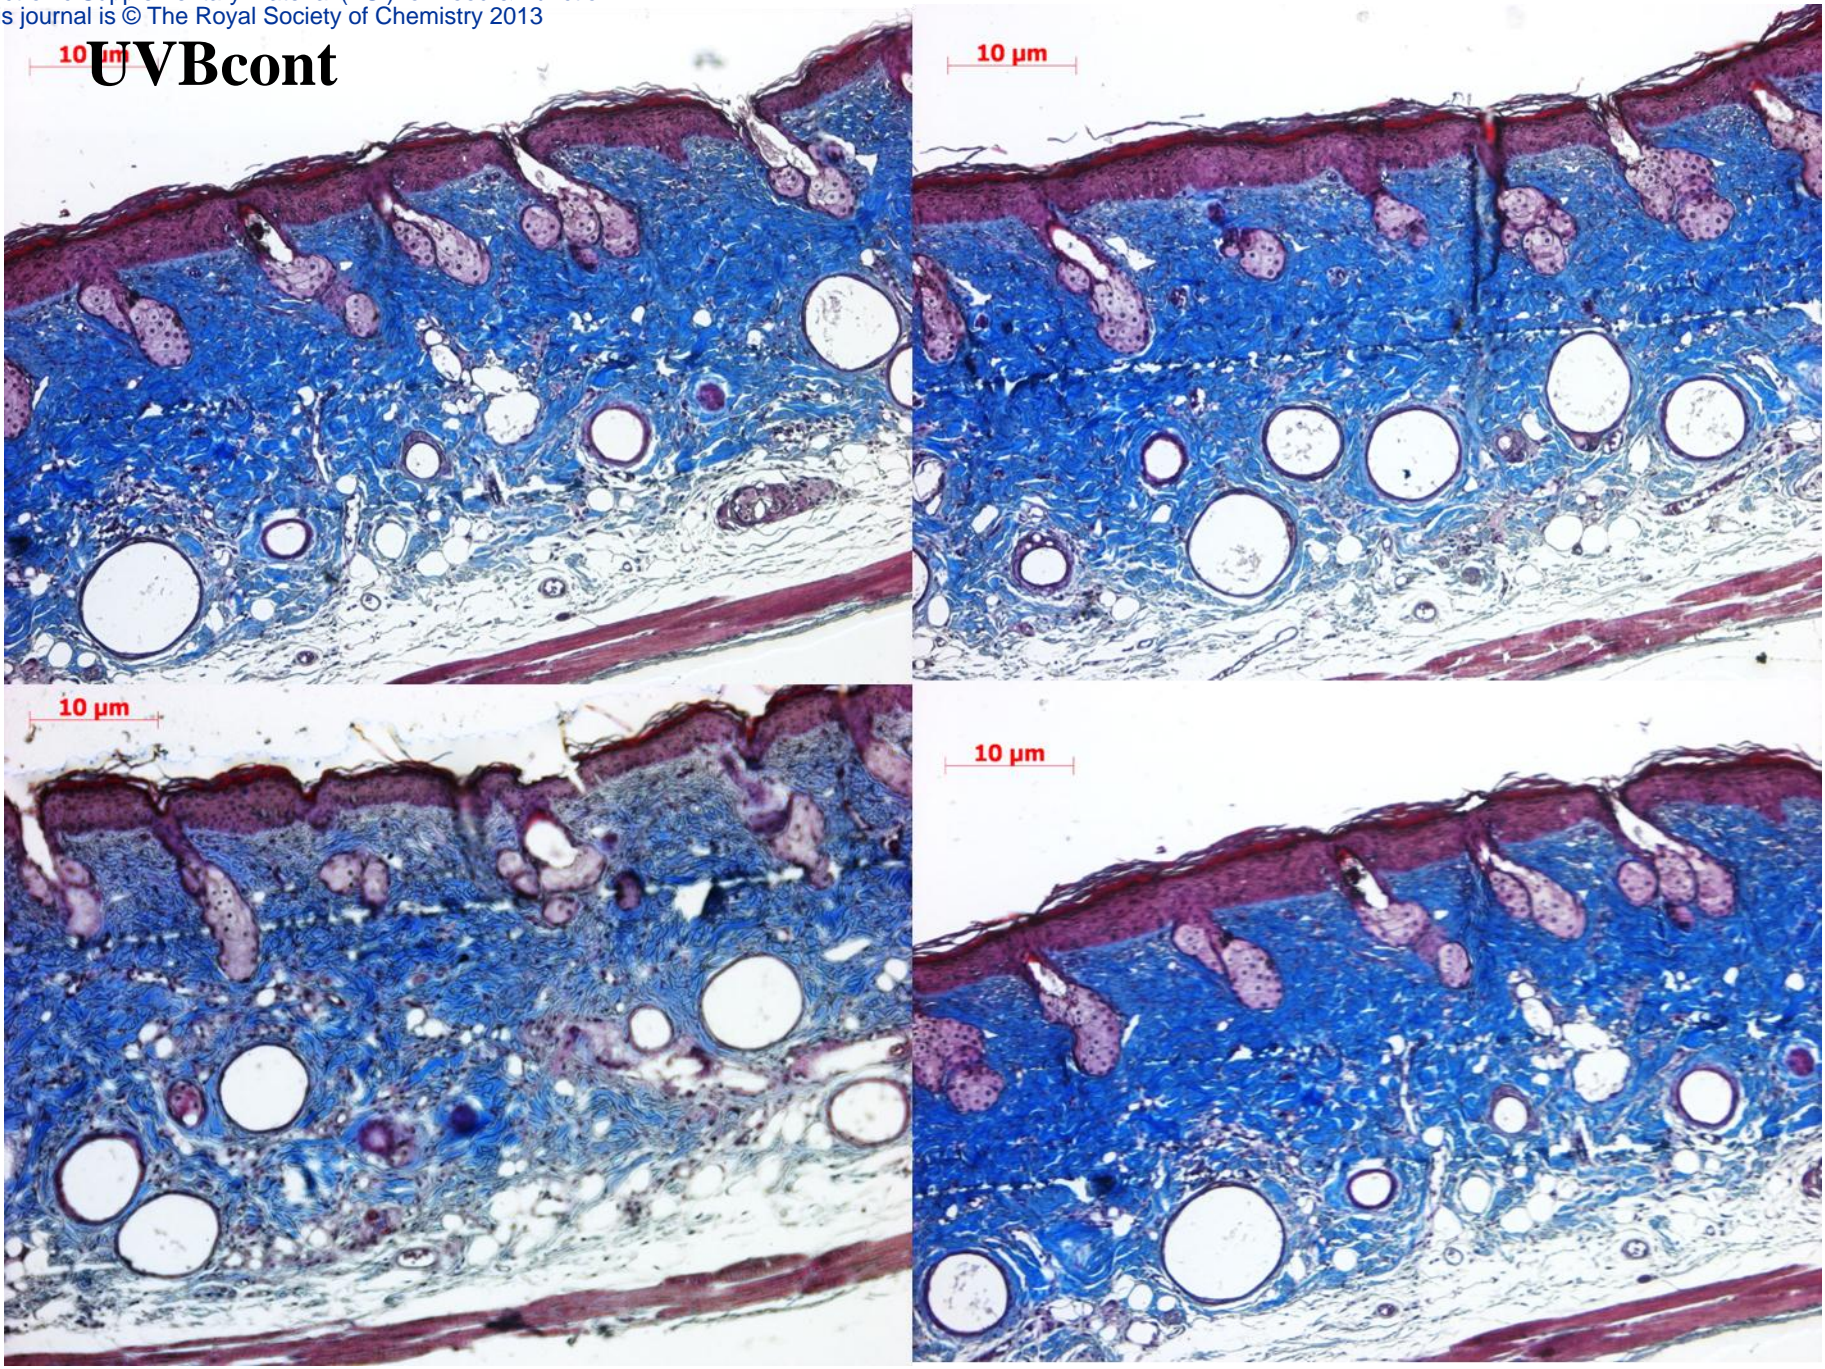



EG 1%

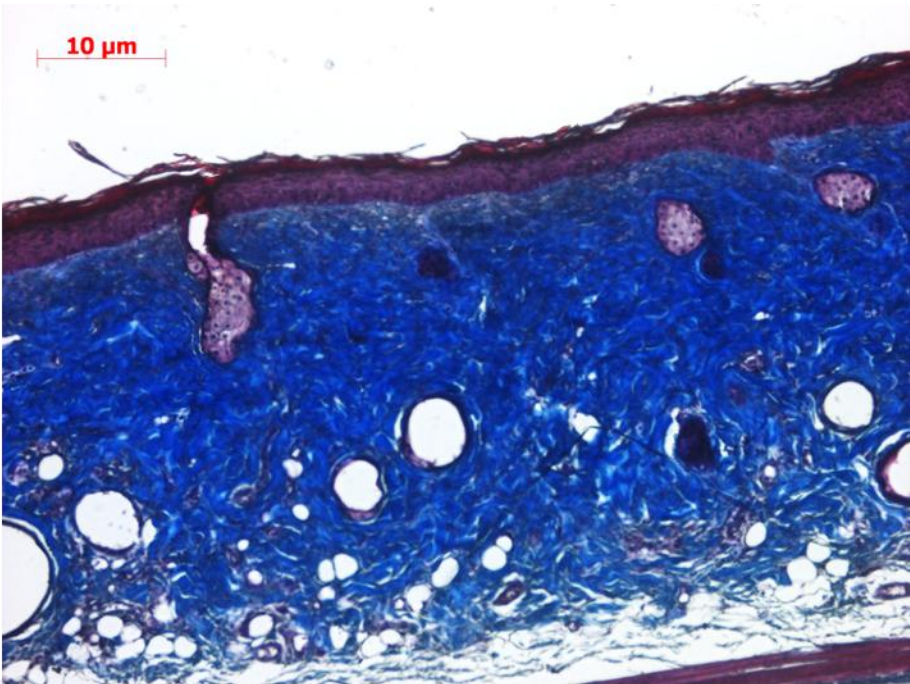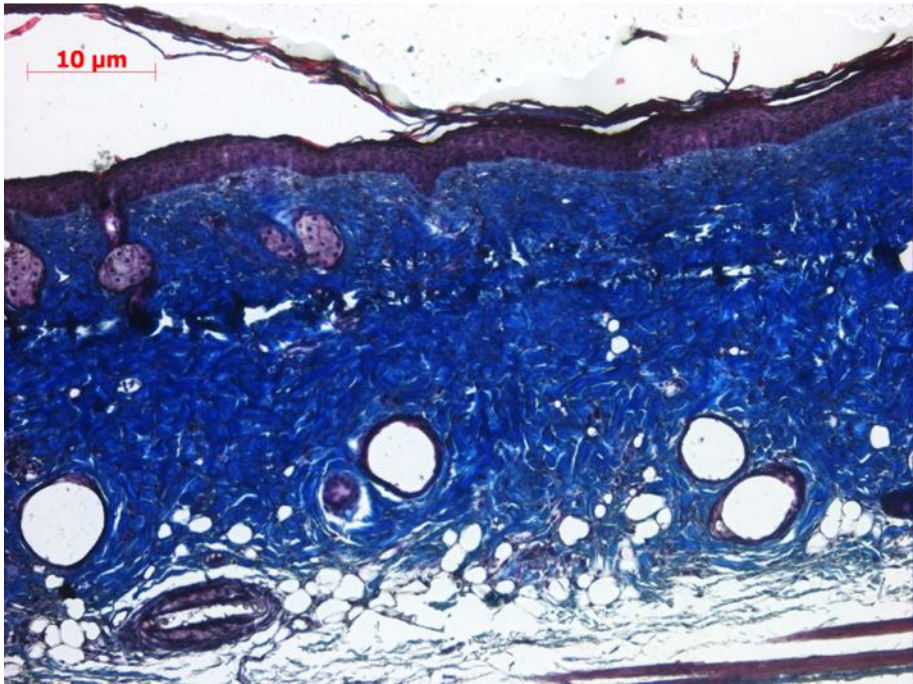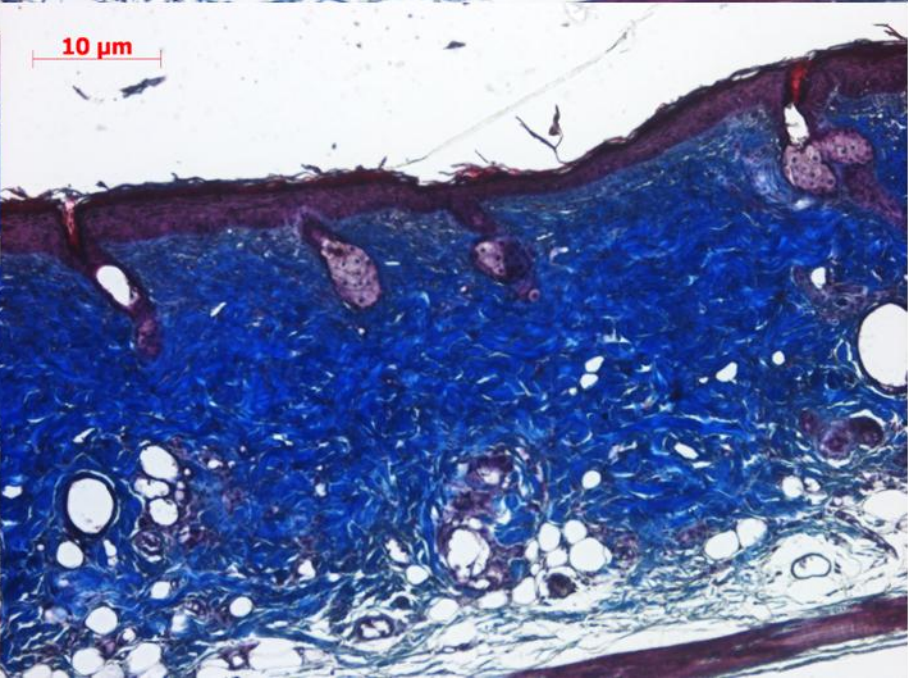



## EG 5%

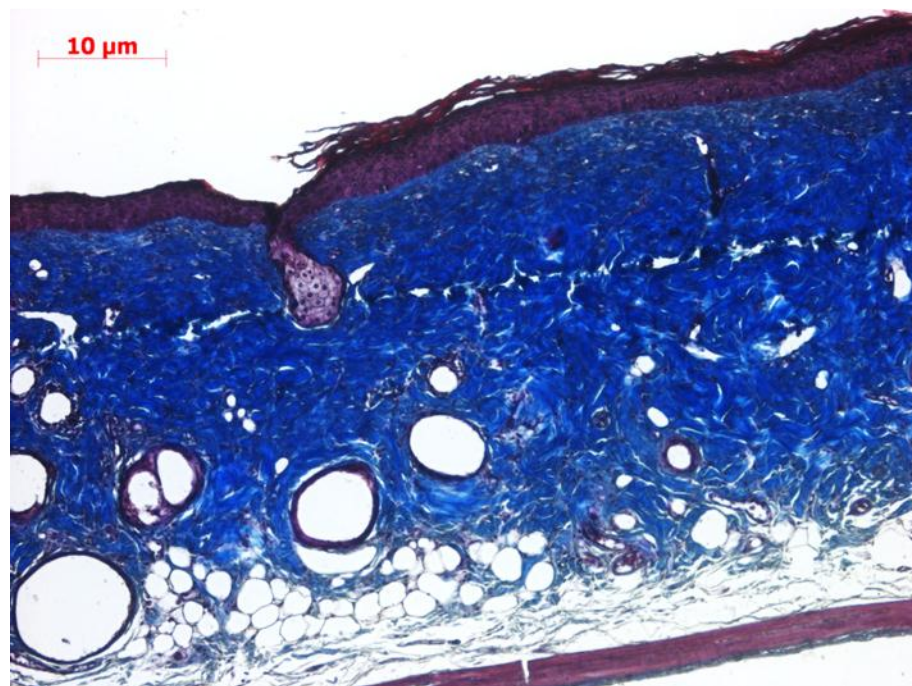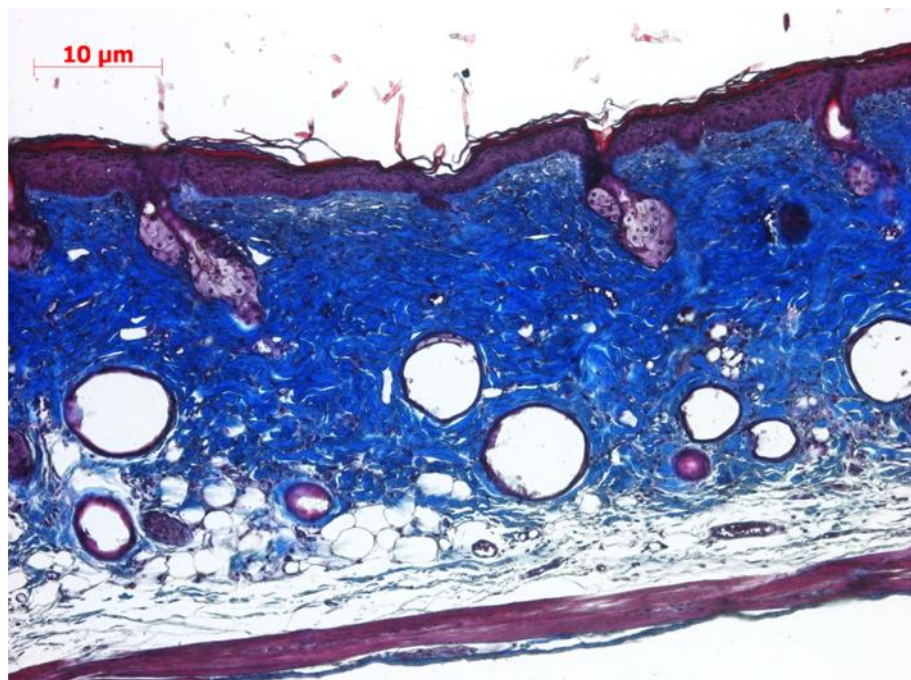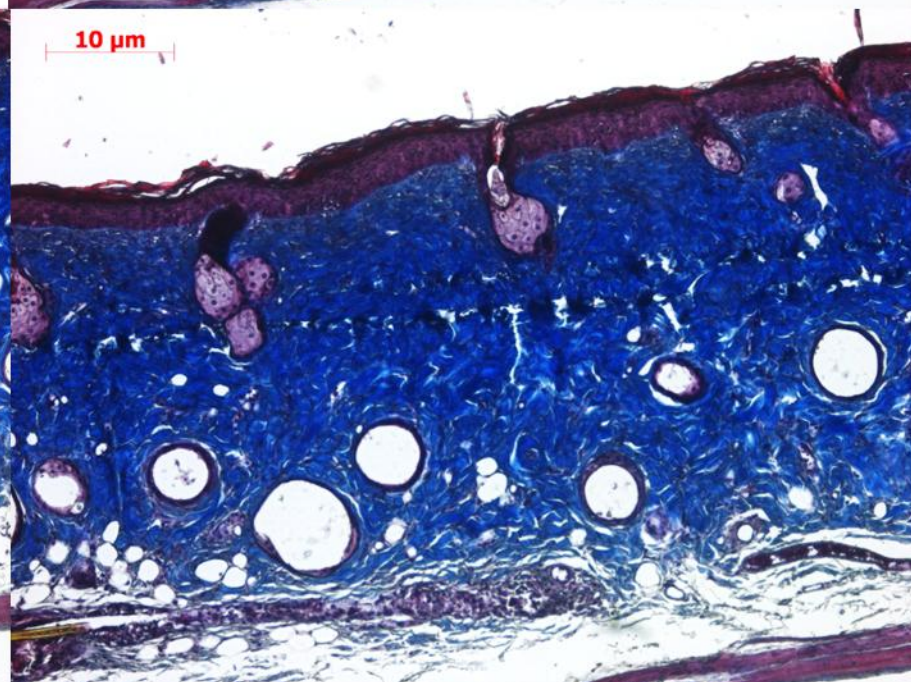



## RP 1%

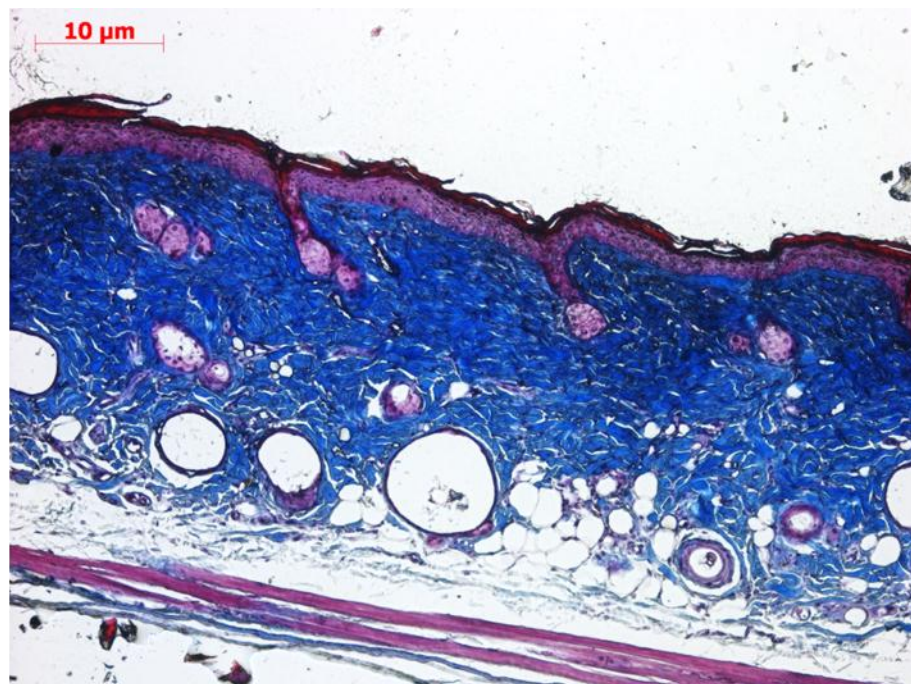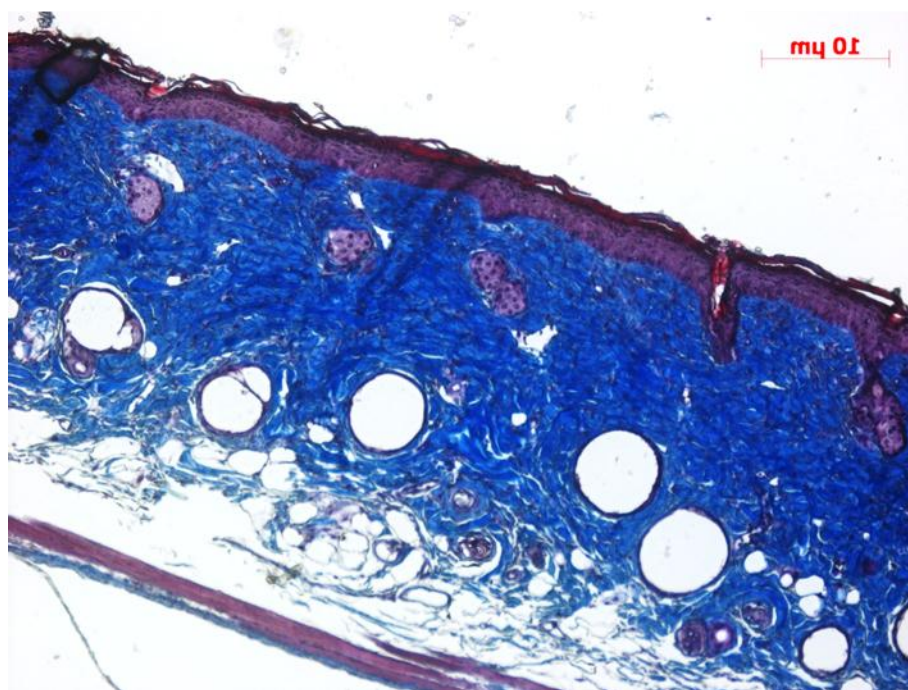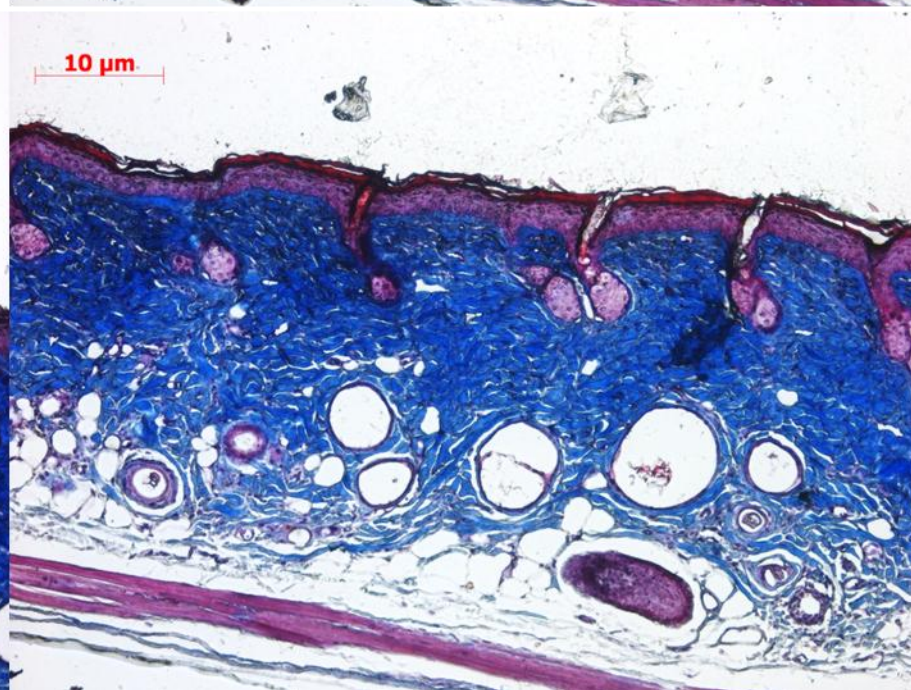

Supplement: c3fo60418g.pdf [file c3fo60418g.pdf]
